# Supplementary material
Source: PubMed Central journal article supplement (PMC6175606)
Supplement: NIHMS871033-supplement-1.pdf [file NIHMS871033-supplement-1.pdf]

**A**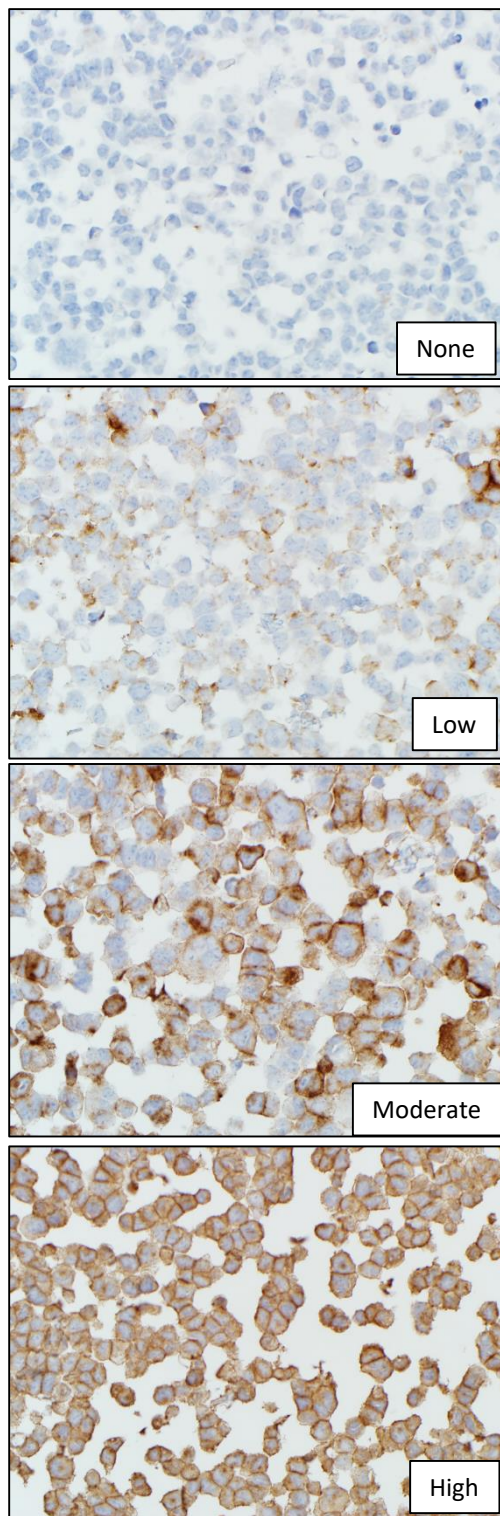**B**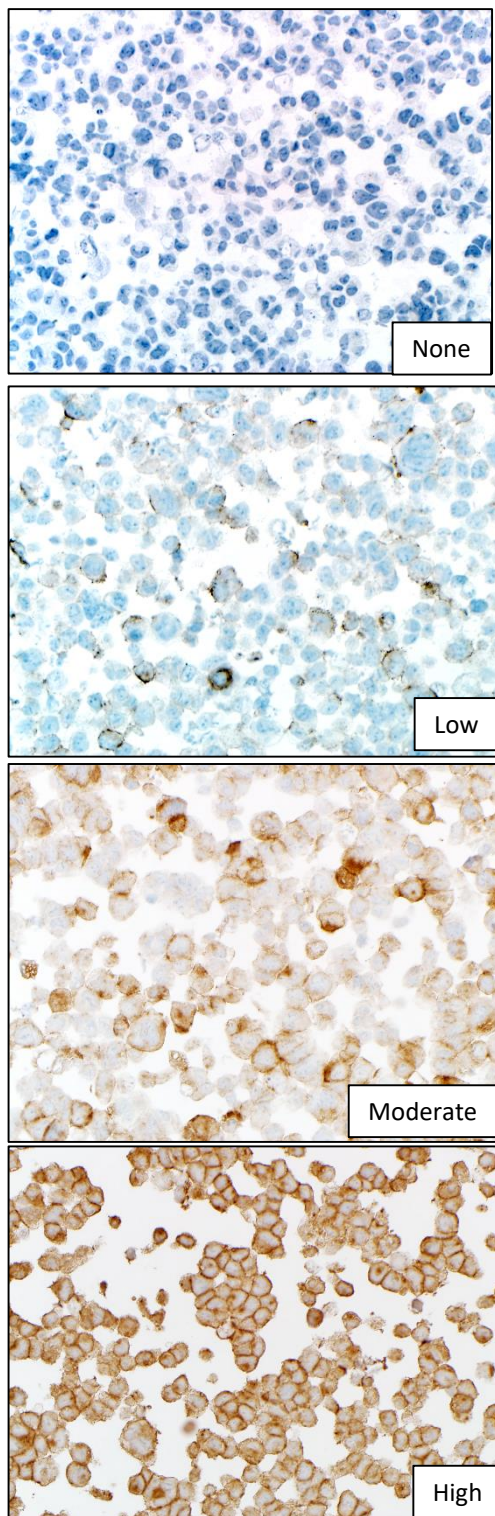

**Supplementary Figure S1. Optimization of primary antibody concentration and antigen retrieval for PD-L1 IHC laboratory derived test using Horizon PD-L1 IHC reference standard.** The reference slides contain an engineered cell line array with a range of protein expression levels (none, low, moderate, and high). Shown here are representative images for **(A)** the 5H1 clone and **(B)** the 22C3 clone. All other clones showed a similar staining patterns using the final assay conditions (data not shown). 400x original magnification, all panels.

**A****Tumor HPF Selection****40x (Low Power)****200x (High Power)**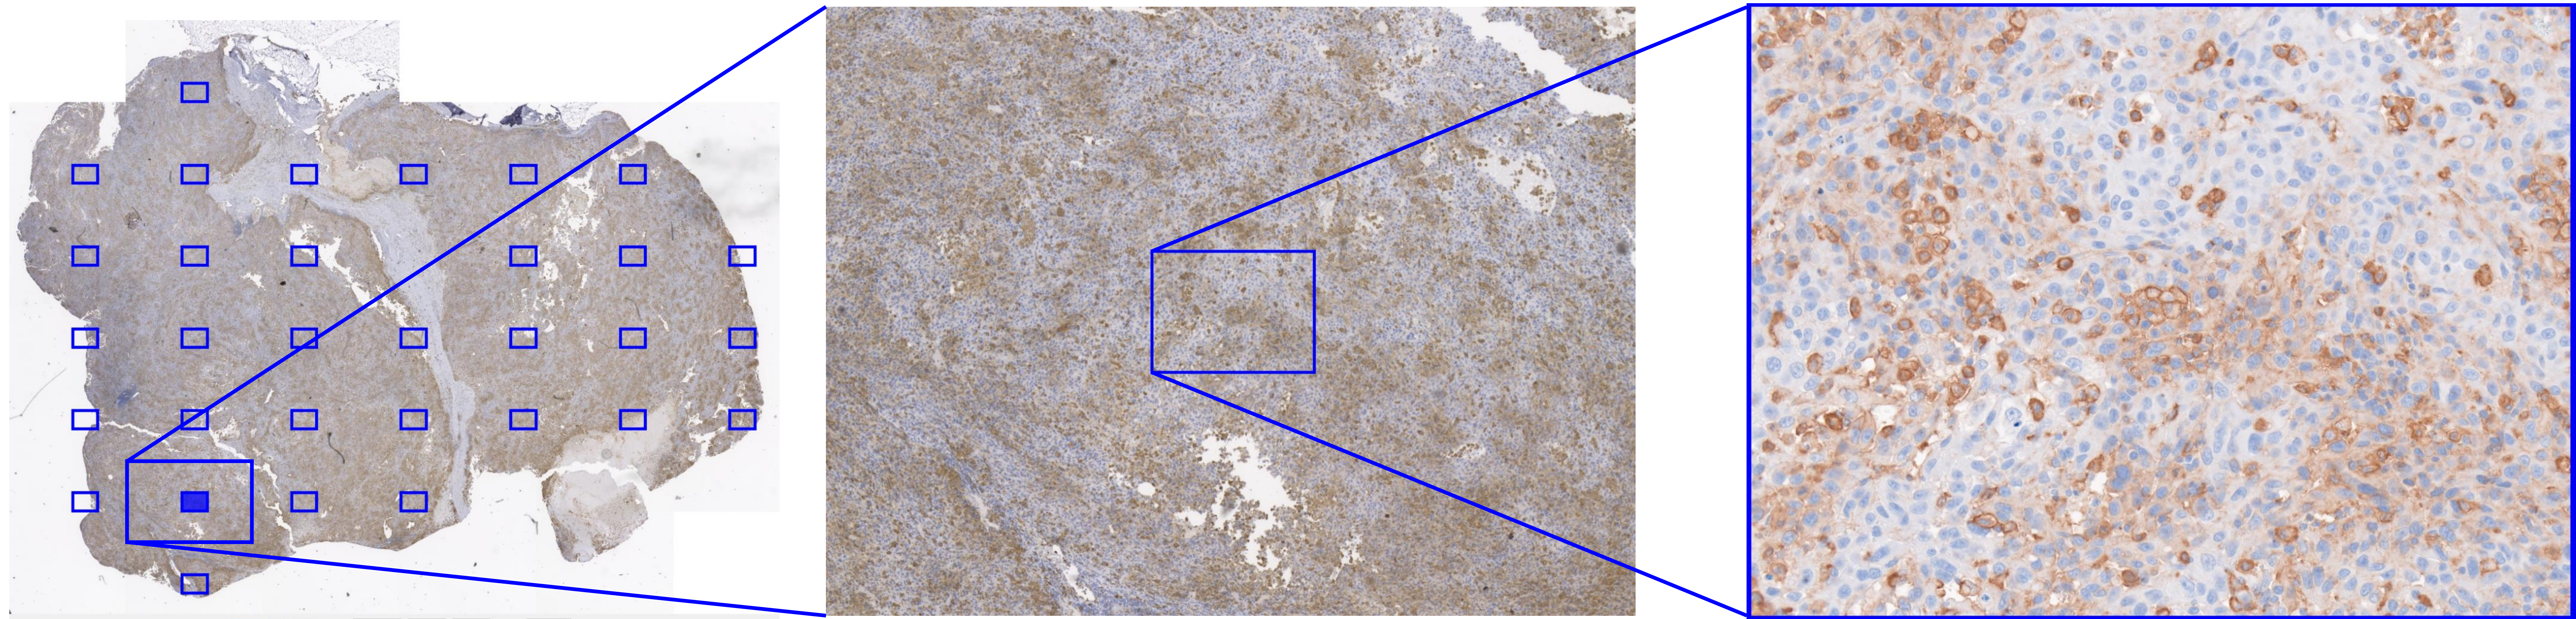**Cell Segmentation and Scoring****B**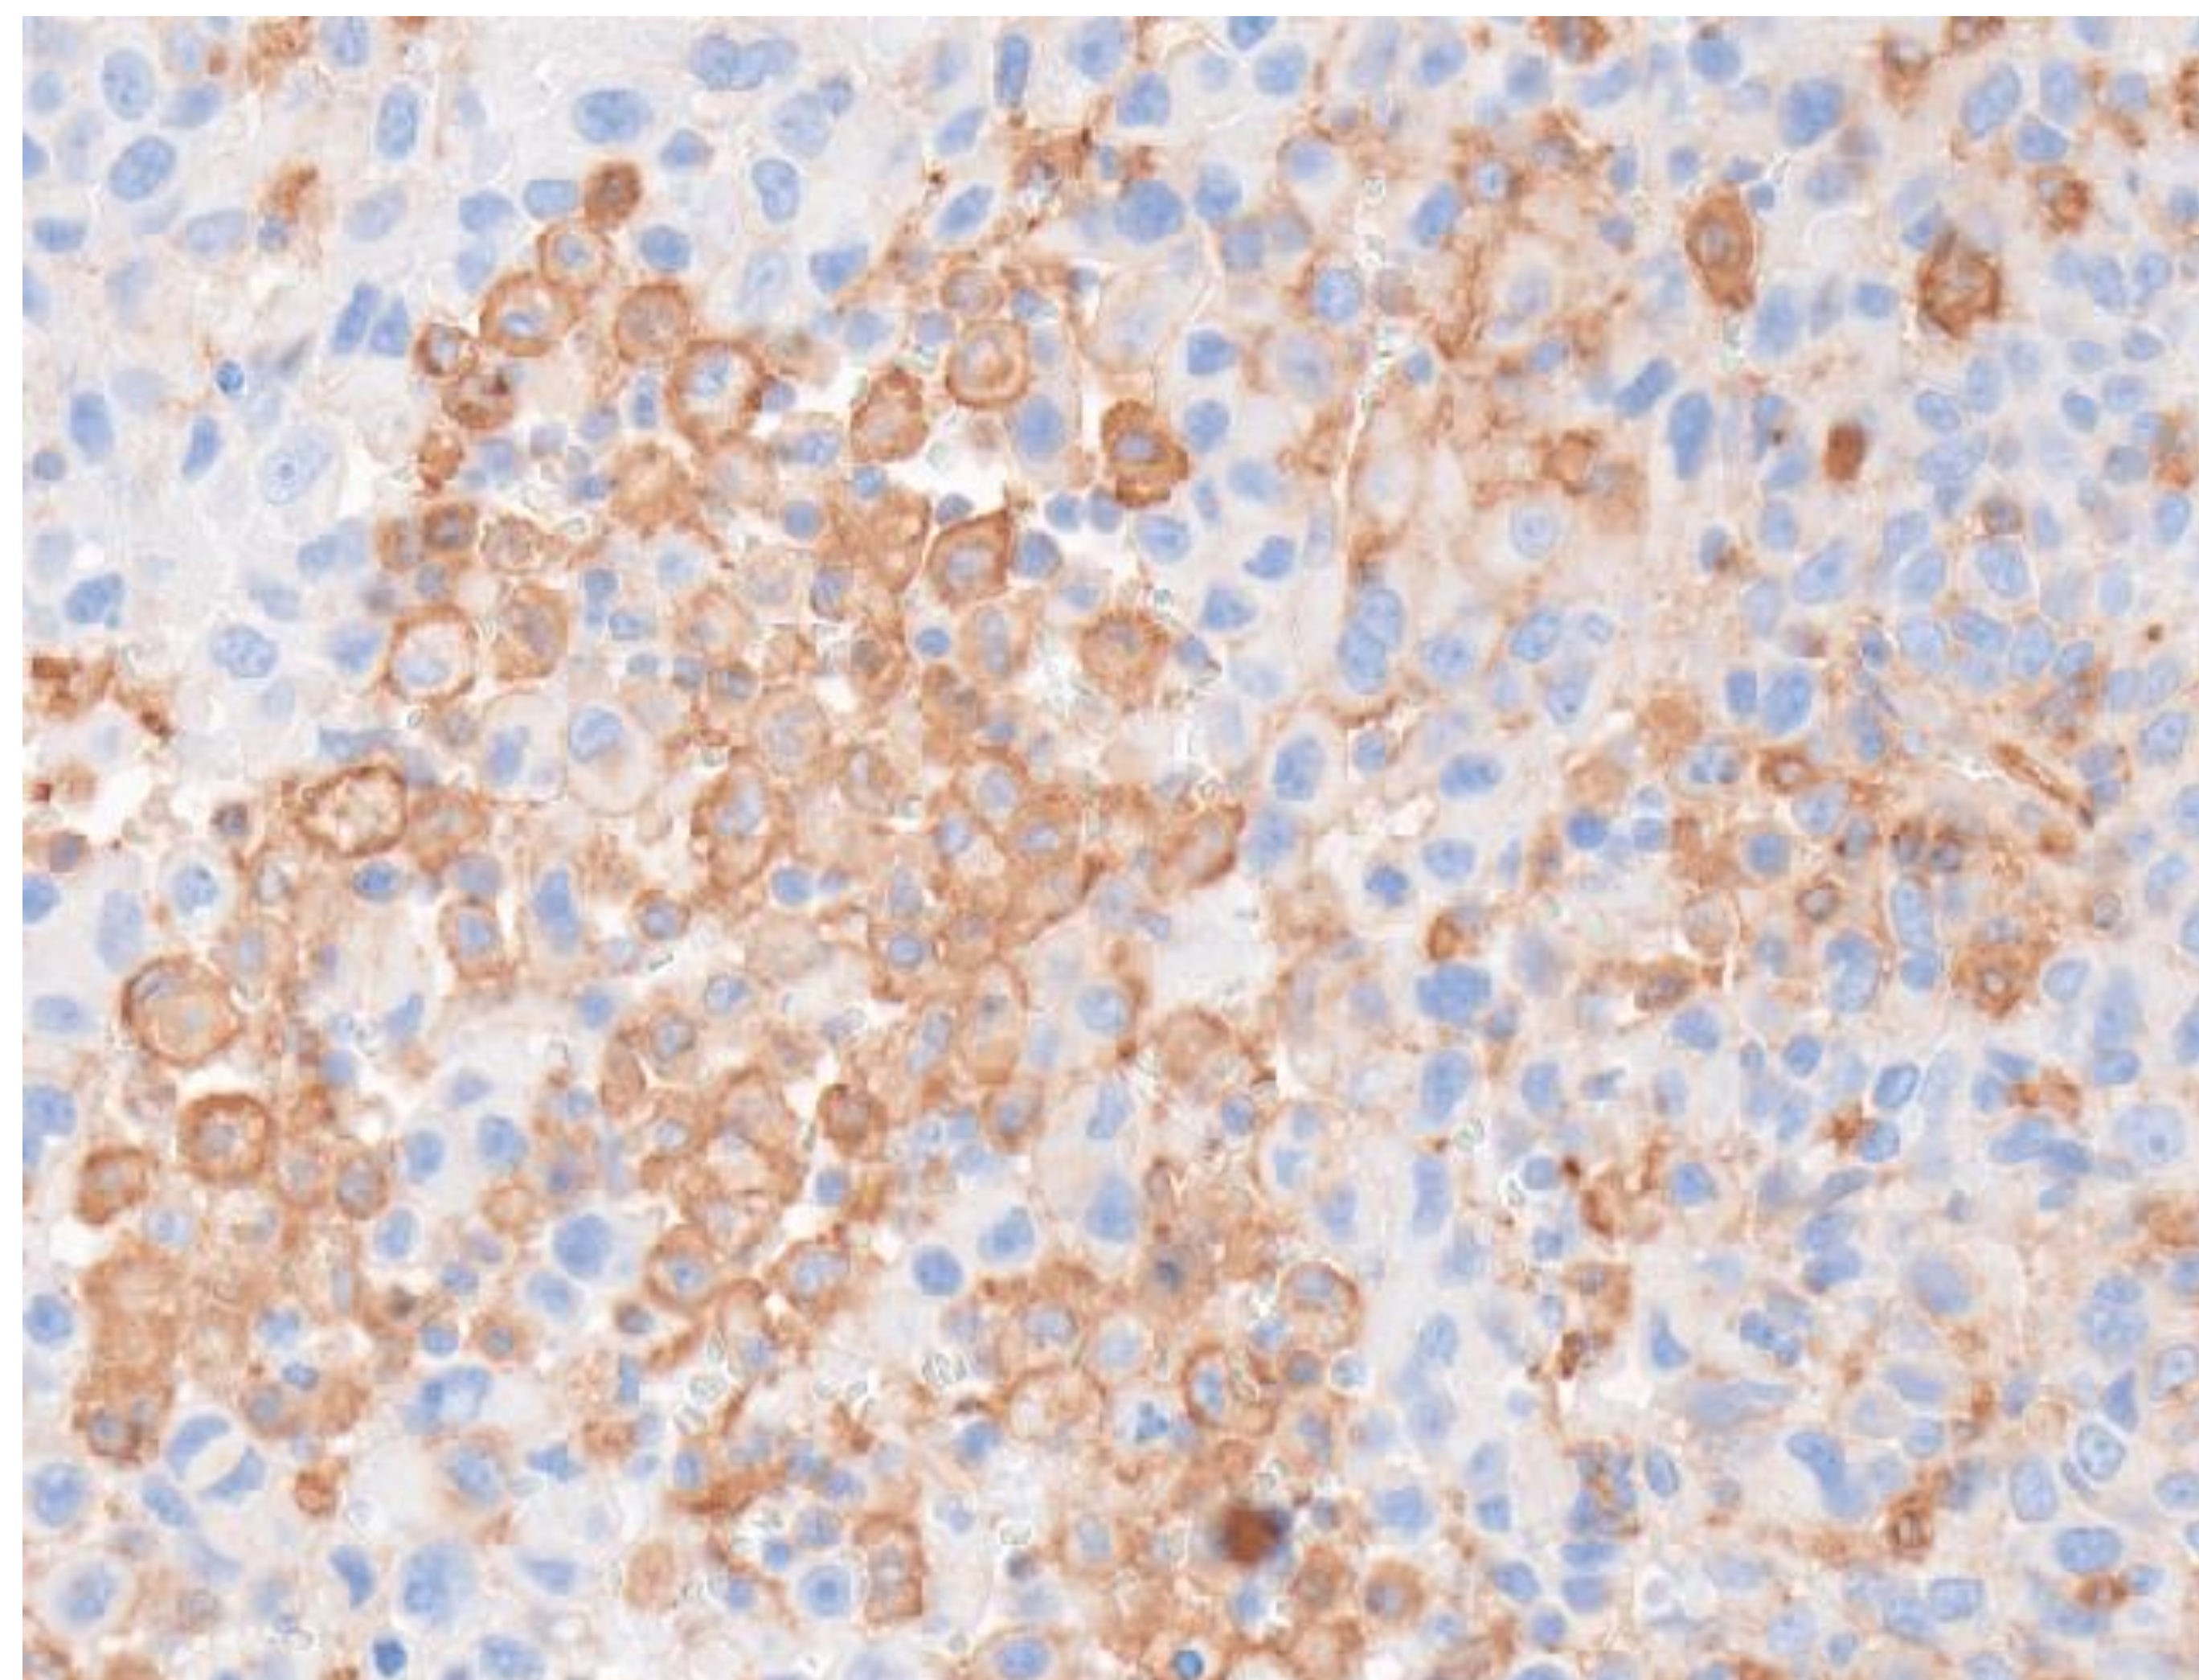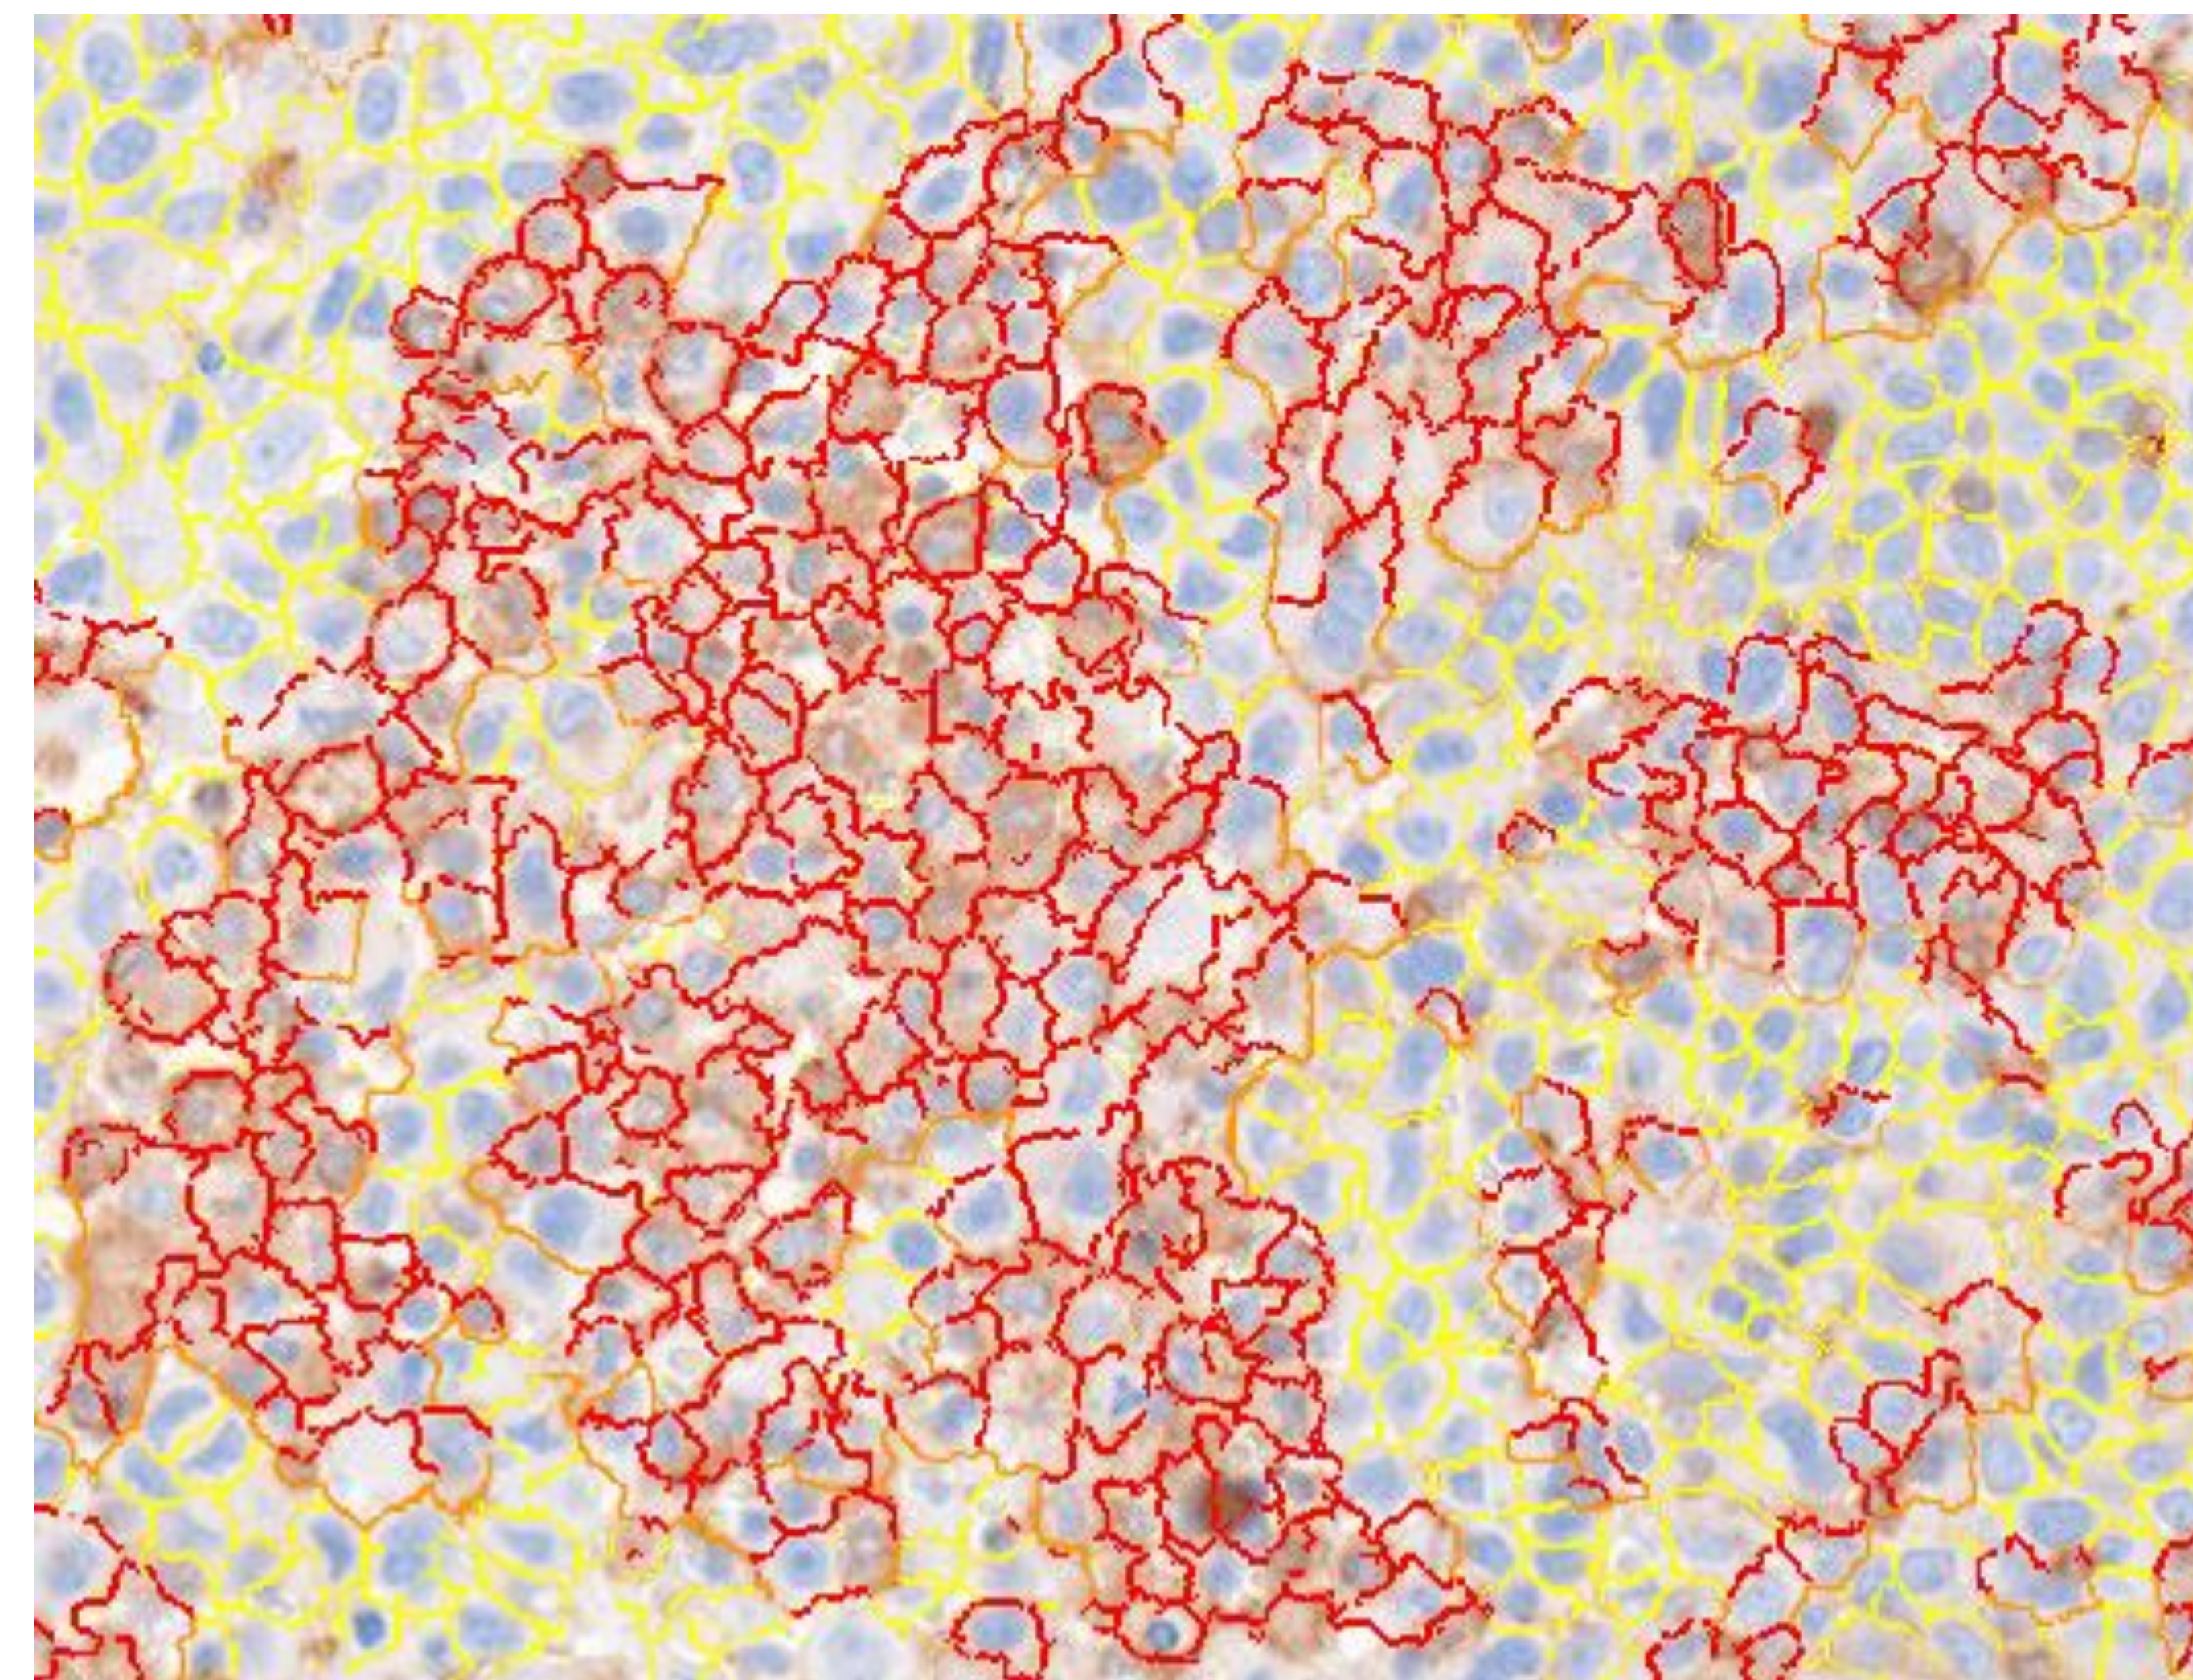

■ PD-L1+

■ PD-L1-

**Supplementary Figure S2. Computer-assisted imaging and scoring workflow. (A).** Representative whole mount images (left panel), 40x (middle), and 200x (right) that were acquired of a metastatic melanoma specimen that was sampled at a frequency of 1:16. **(B).** Representative image at 500x (left panel) and resultant automated cell segmentation and scoring of membranous PD-L1 expression (right panel) shows the classification of PD-L1(+) cells by red outlines and PD-L1(-) cells by yellow outlines.

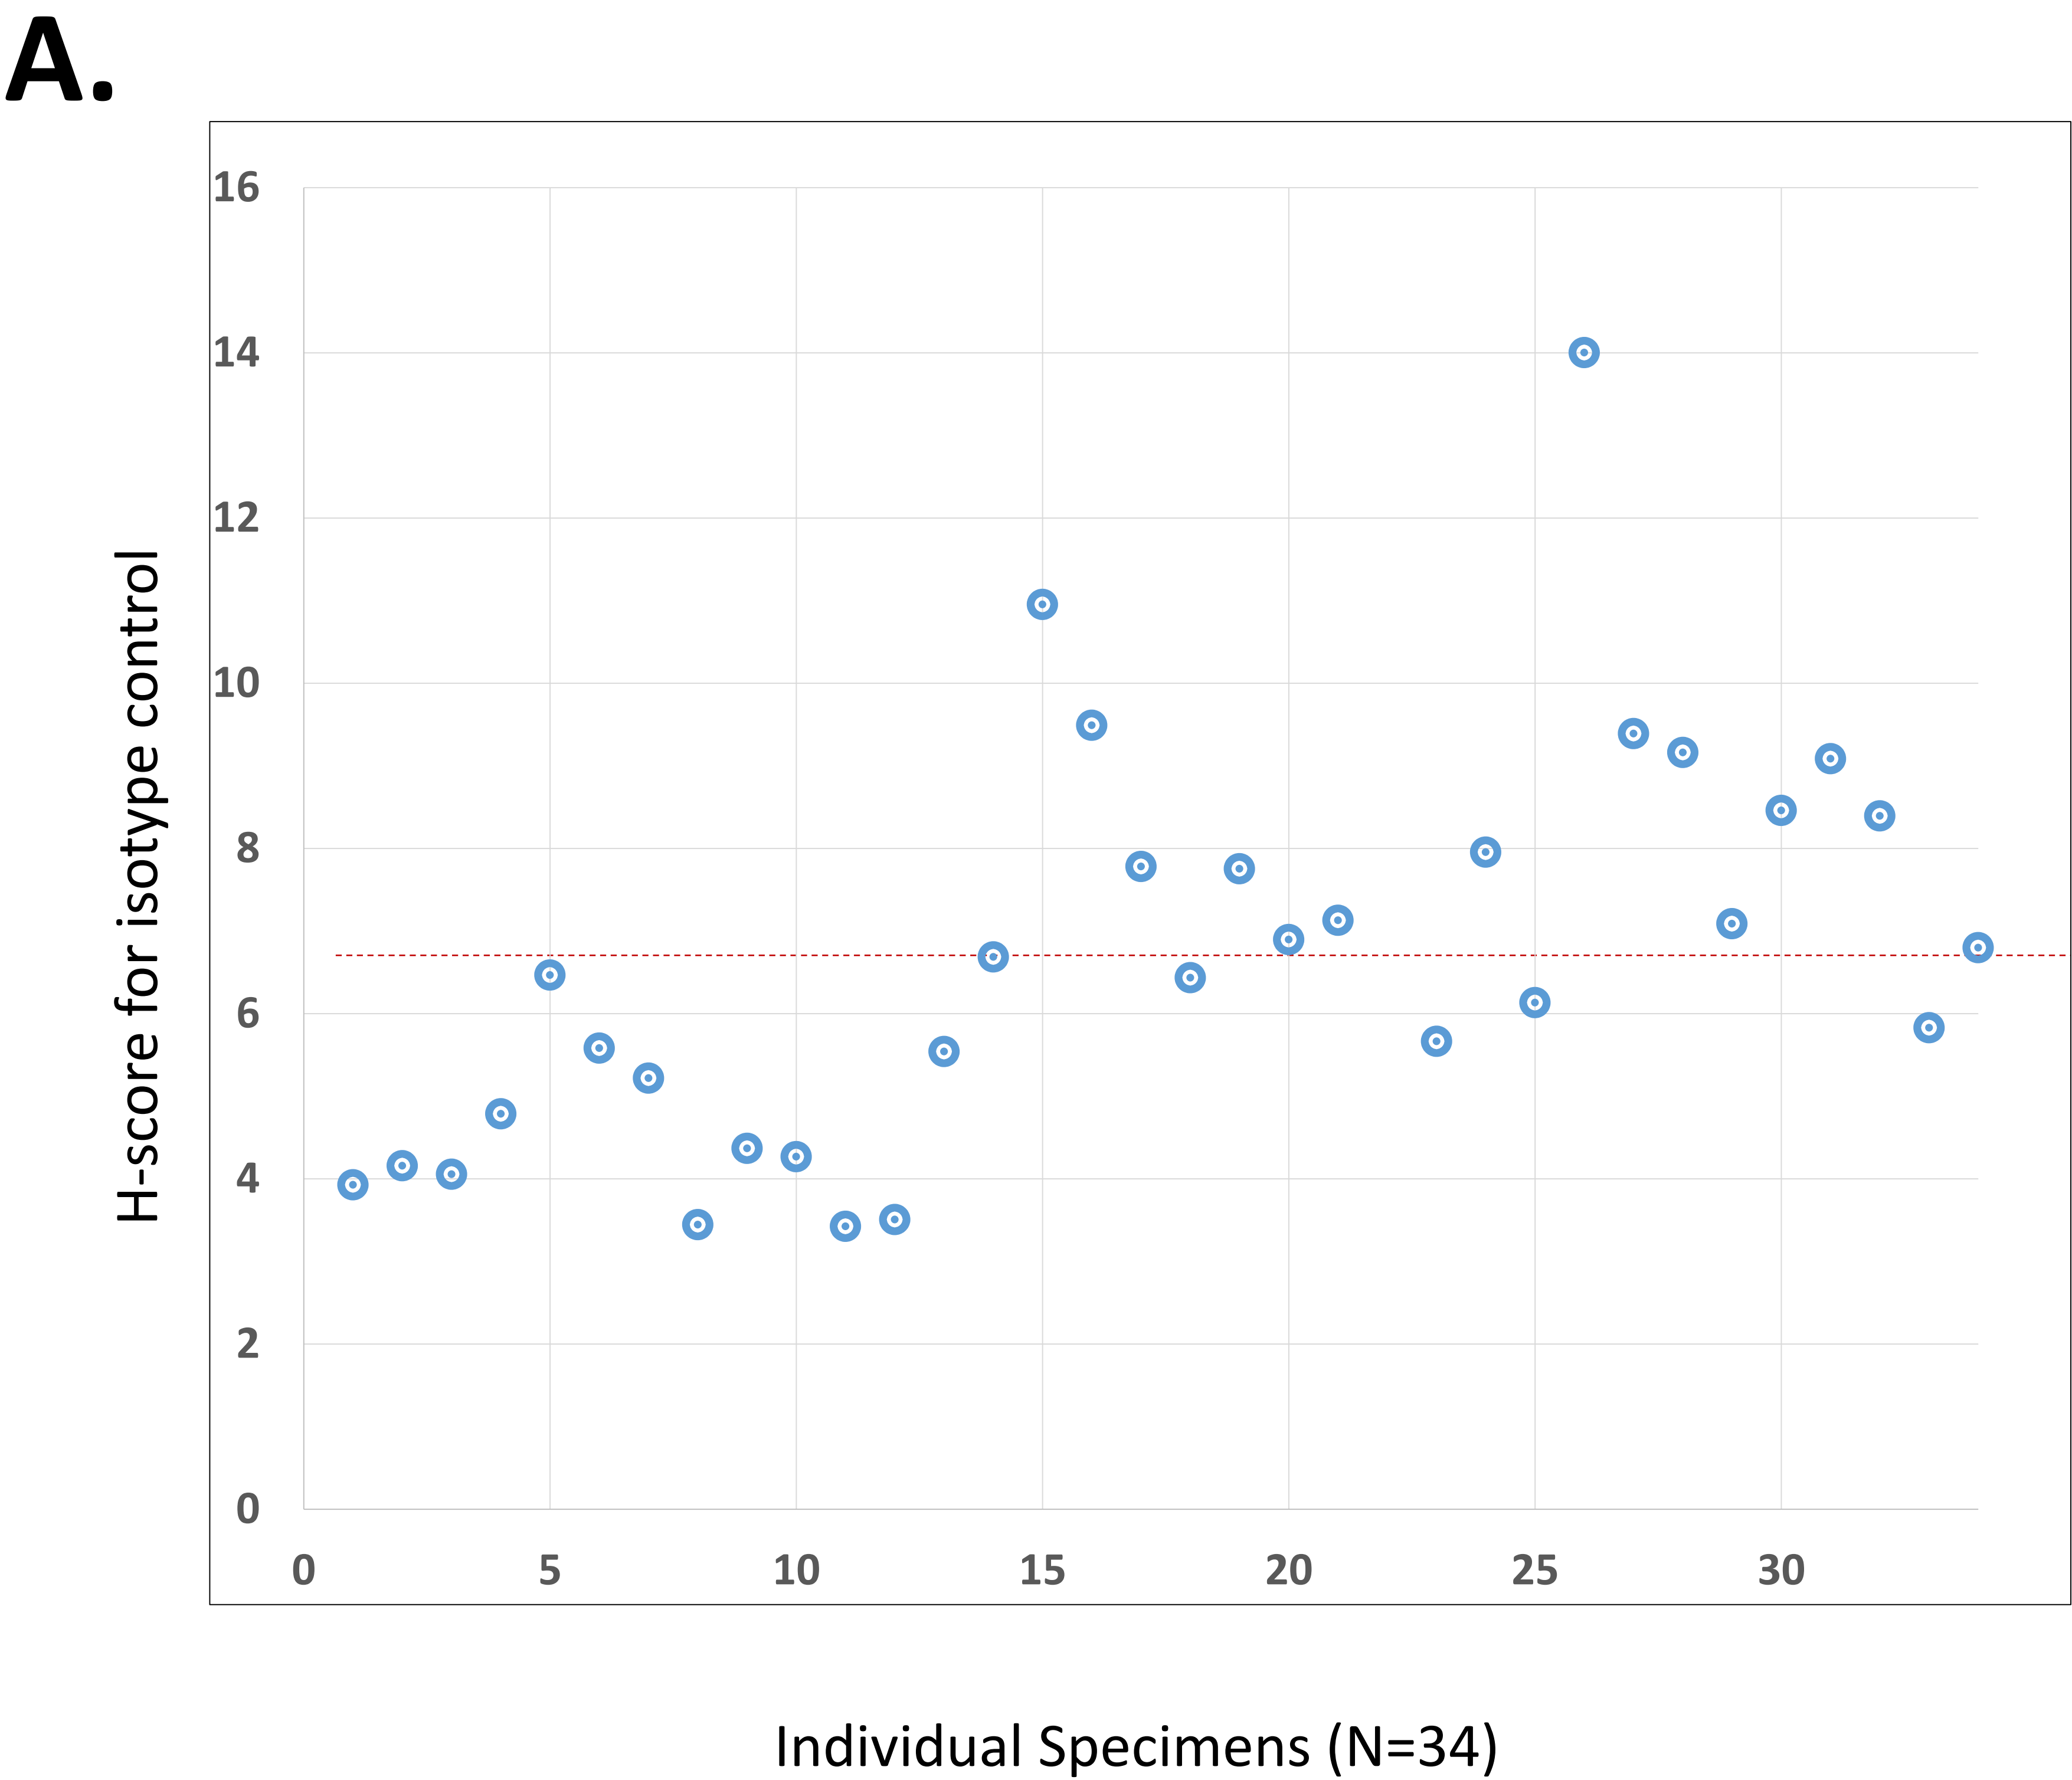

**B.**

|       | 5H1   | SP142 | 28-8  | SP263 | 22-C3 |
|-------|-------|-------|-------|-------|-------|
| 5H1   |       | 0.883 | 0.943 | 0.859 | 0.963 |
| SP142 | 0.883 |       | 0.966 | 0.987 | 0.979 |
| 28-8  | 0.943 | 0.966 |       | 0.966 | 0.952 |
| SP263 | 0.859 | 0.987 | 0.966 |       | 0.986 |
| 22-C3 | 0.963 | 0.979 | 0.952 | 0.986 |       |

**C.**

|       | 5H1   | SP142 | 28-8  | SP263 | 22-C3 |
|-------|-------|-------|-------|-------|-------|
| 5H1   |       | 0.808 | 0.838 | 0.829 | 0.949 |
| SP142 | 0.808 |       | 0.909 | 0.910 | 0.885 |
| 28-8  | 0.838 | 0.909 |       | 0.921 | 0.916 |
| SP263 | 0.829 | 0.910 | 0.921 |       | 0.877 |
| 22-C3 | 0.949 | 0.885 | 0.916 | 0.877 |       |

**Supplementary Figure 3. Melanin in the cytoplasm does not impact the observed high concordances between PD-L1 antibodies.** The H-score of the isotype control largely reflects the amount of melanin within the tumor cells. **(A)** The cohort was divided at the median H-score (red dotted line) , and concordances were assessed for **(B)** cases with higher melanin content (n=16) and **(C)** cases with lower melanin content (n=18).

|                   | Sampling Frequency |          |       |          |       |         |              |
|-------------------|--------------------|----------|-------|----------|-------|---------|--------------|
| Pathologist Score | 1:25               | 1:25 inv | 1:16  | 1:16 inv | 1:9   | 1:9 inv | 1:1          |
| ~30%              | 35.7%              | 35.6%    | 31.2% | 30.1%    | 32.6% | 32.0%   | <b>31.9%</b> |
| ~15%              | 18.0%              | 15.1%    | 16.0% | 15.4%    | 14.8% | 18.3%   | <b>16.6%</b> |
| <5%               | 6.1%               | 7.4%     | 3.9%  | 2.2%     | 3.8%  | 3.3%    | <b>3.4%</b>  |

**Supplementary Table S1. Determination of sampling frequency for computer-assisted quantification of cell membranous PD-L1 expression.** Full coverage high-power field imaging at 200x of an entire whole-mount tumor slide using the Vectra system results in very high data usage, with a 2 cm tumor requiring upwards of 500 200x fields and occupying over 75 GB of hard disk space. In an effort to determine if a lower imaging coverage would be sufficient to accurately assess the level of PD-L1 expression in the tumor, we optimized our sampling frequency, **Supplementary Figure S2**. Three melanoma specimens stained with SP142 were identified that had total cell percentage of PD-L1 expression ranges from 0 -  $\leq 5\%$ , 10 - 15%, and 25 - 30%, as assessed by pathologists on light microscopy. Automated image analysis was then used to assess the percentage of total cells demonstrating membranous PD-L1 expression at three coverage ratios (1:9, 1:16, and 1:25). Slides were then inverted, imaged, and scored again at the same ratios. Results were compared to the score obtained by 200x imaging of the entire tumor (listed under heading of 1:1 ratio in the table). A single representative case for each PD-L1 expression level is shown here. We found that sampling at 1:16 and 1:9 showed internally consistent results, as inverting and then resampling produced estimates of PD-L1 positivity that differed by only ~1% and was also within ~1% from the results generated when imaging the entire tumor.

|       | 5H1   | SP142 | 28-8  | SP263 | 22-C3 |
|-------|-------|-------|-------|-------|-------|
| 5H1   |       | 0.946 | 0.925 | 0.949 | 0.960 |
| SP142 | 0.946 |       | 0.938 | 0.968 | 0.907 |
| 28-8  | 0.925 | 0.938 |       | 0.962 | 0.903 |
| SP263 | 0.949 | 0.968 | 0.962 |       | 0.884 |
| 22-C3 | 0.960 | 0.907 | 0.903 | 0.884 |       |

**Supplementary Table S2. Concordances between PD-L1 antibodies using a single computerized scoring algorithm.** Cases deemed by the pathologists to have not been scored correctly by the initial algorithm and which required additional tuning (43/170) were excluded from this analysis.
